# Supplementary material
Source: PubMed Central journal article supplement (PMC2533075)

## SUPPLEMENTARY FIGURE LEGENDS

Suppl. Fig. S1. Analysis of SUMO conjugation sites in IRF3 and IRF7. (A) 293T cells were transfected with combination of IRF3, IRF3/K152R, SUMO1, and SUMO2 as described on top. SUMOylated IRF3 was detected by immunoprecipitation followed by Western blot analysis. (B, C) 293T cells were transfected with FLAG tagged mutant IRF7 (B) or mutant IRF3 (C) along with V5-SUMO3 for 48 h. Extracts were analyzed as described in Fig. 2.

Suppl. Fig. S2. Induction of IRF7 SUMOylation by VISA. Cells were transfected with FLAG-IRF7 and T7-SUMO1 along with increasing amounts of V5-VISA for 12 h. SUMOylated IRF7 was detected by immunoprecipitation followed by Western blotting with indicated antibodies.

Suppl. Fig. S3. (A) The effect of CIAP treatment on IRF3 phosphorylation. WCE in Fig. 6A were incubated with CIAP at 37°C for 30 min prior to phos-tag (top panel) and normal SDS-PAGE analyses (lower panels). Bands for phosphorylated and unphosphorylated forms of IRF3 were indicated. Asterisks indicate constitutively phosphorylated IRF3. (B) Phos-tag SDS PAGE analysis of IRF3/J2A and IRF3/J2A/K152R. Cells were transfected with FLAG tagged IRF3/J2A or IRF3/J2A/K152R and V5-VISA. VISA-induced phosphorylation of IRF3 mutants was tested in phos-tag and normal SDS-PAGE analyses. (C) Extracts in (B) were incubated with CIAP as in (A) prior to phos-tag and normal SDS-PAGE analyses. Asterisks indicate constitutively phosphorylated IRF3. (D) Cells transfected with wt IRF3 or IRF3/J2A along with V5-SUMO3 were infected with VSV and SUMO3 conjugated IRF3 in extracts prepared at indicated time points were analyzed as described in Fig. 6D.

Suppl. Fig. S4. Cells were transfected with wt IRF3 (A), wt IRF7 (B) or constitutively active mutants (5D and 6D) along with T7-SUMO1. SUMOylated IRF3 or IRF7 was detected by immunoprecipitation followed by Western blot analysis with indicated antibodies.

# Supplementary Fig. S1

## A

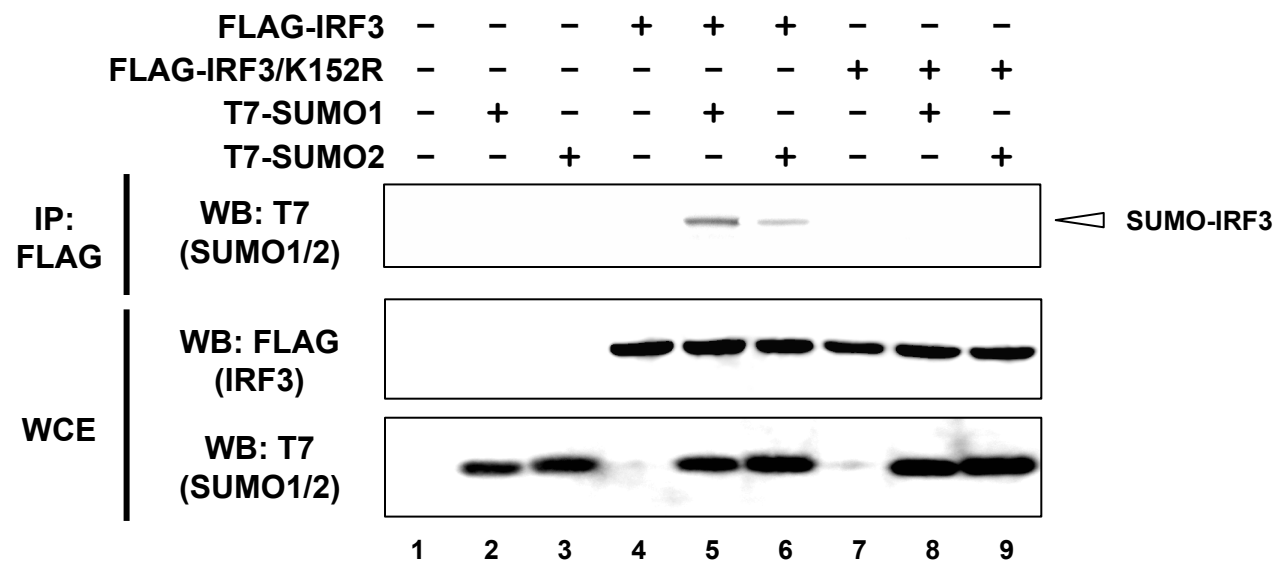

Supplementary Fig. S1

**B**

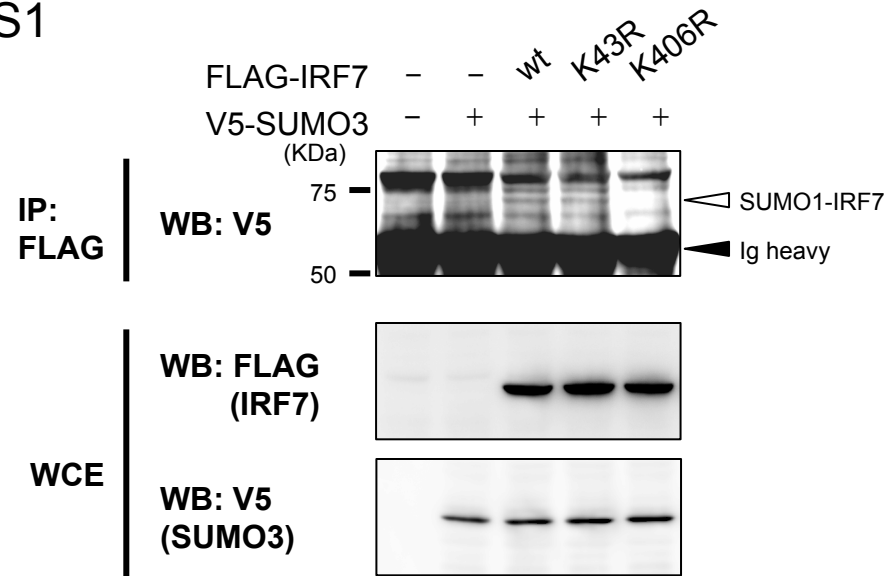

**C**

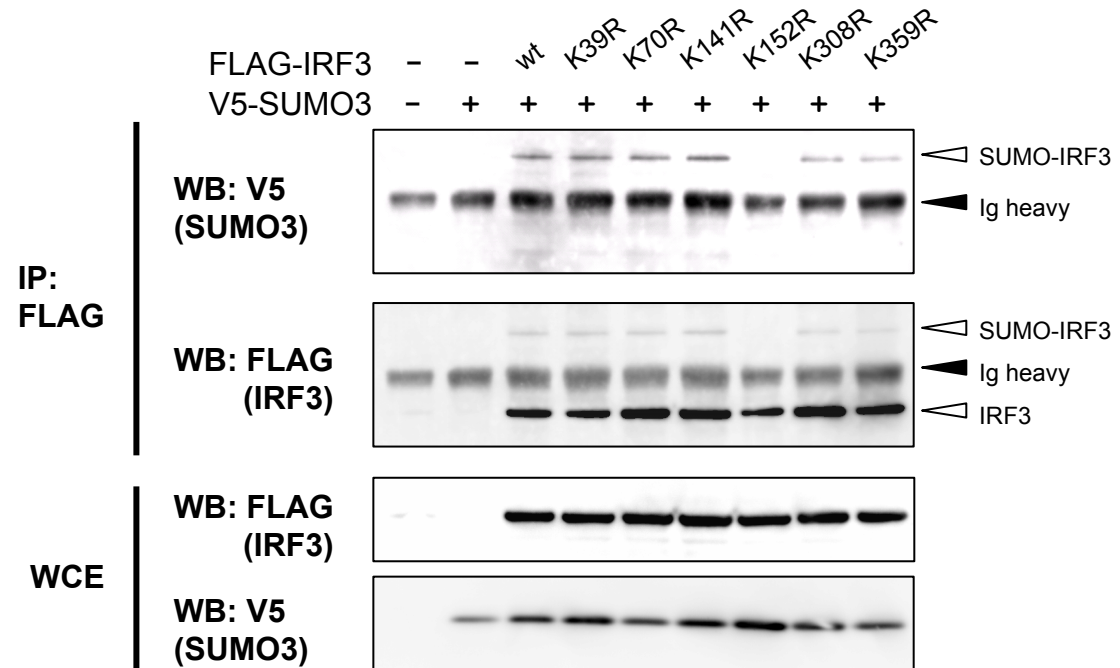

Supplementary Fig. S2

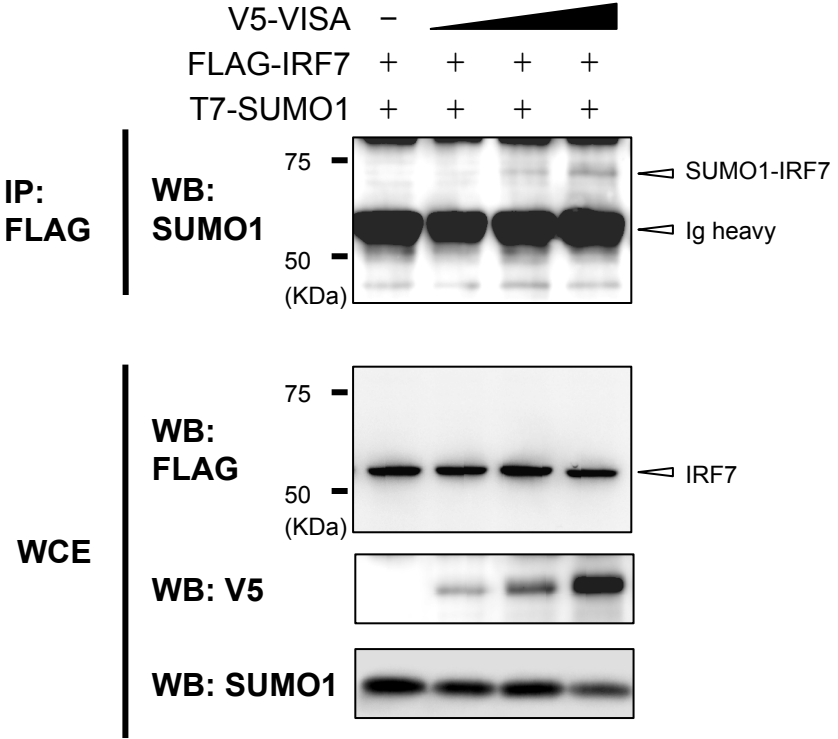

# Supplementary Fig. S3

## A

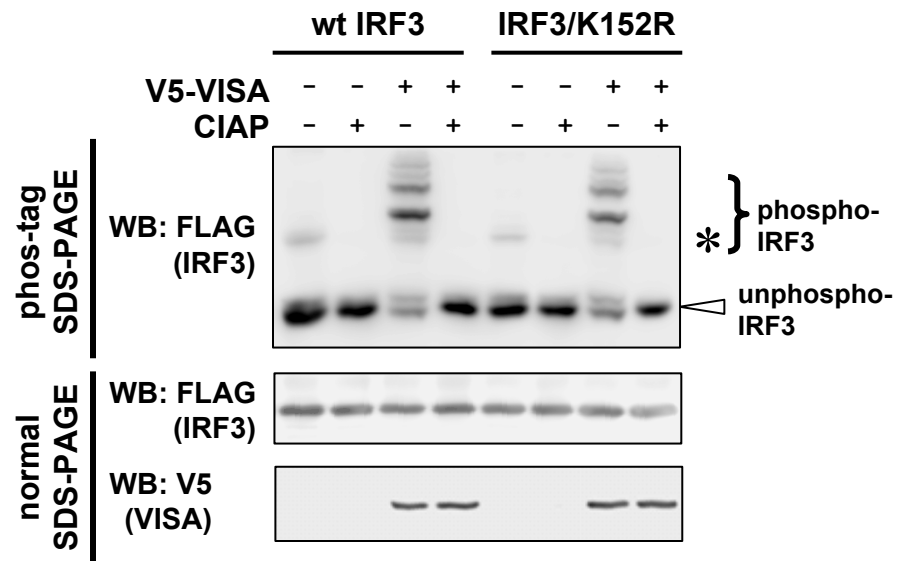

# Supplementary Fig. S3

## B

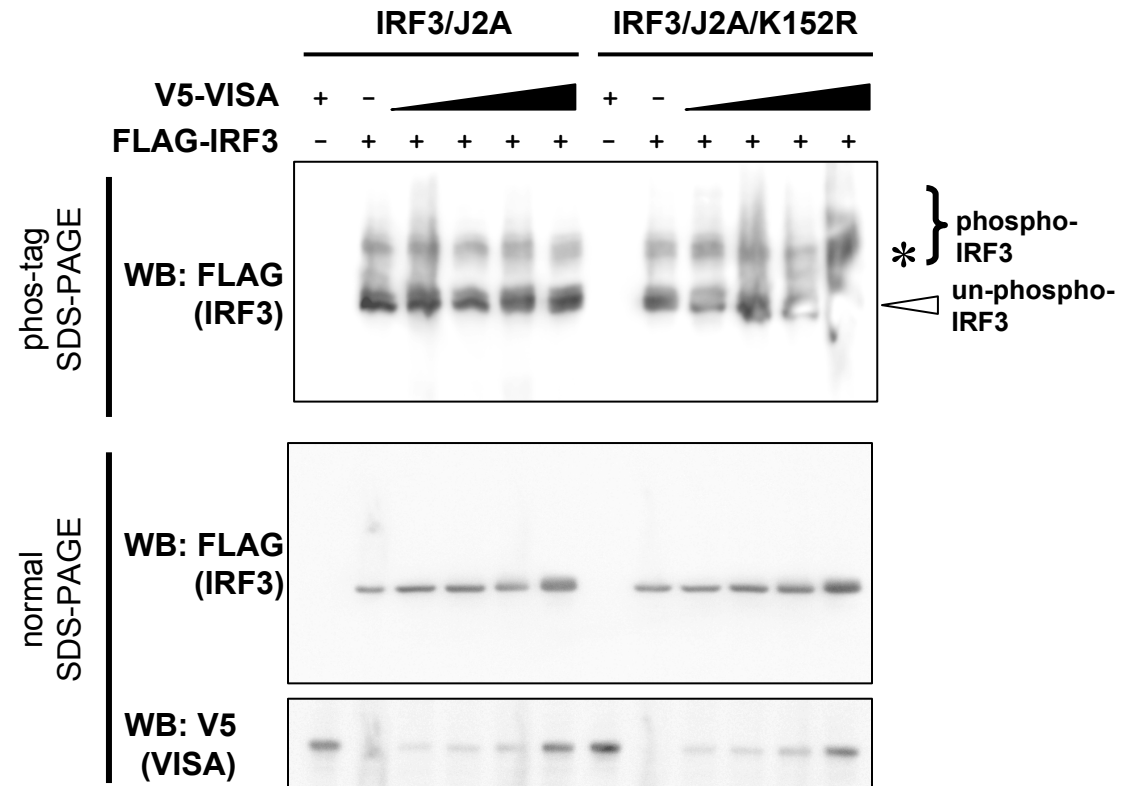

Supplementary Fig. S3

**C**

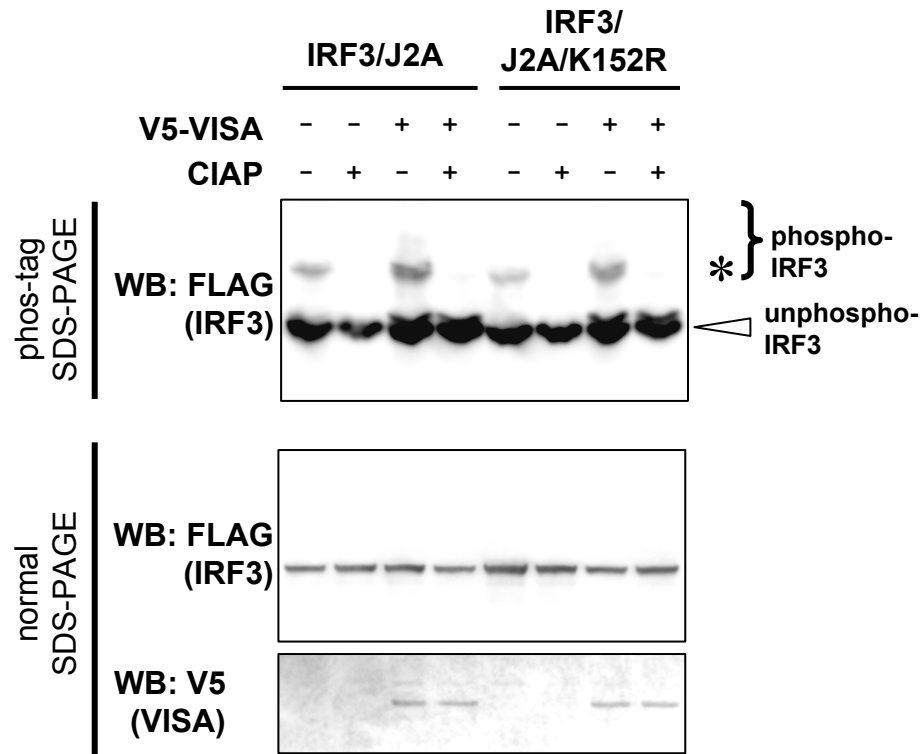

# Supplementary Fig. S3

## D

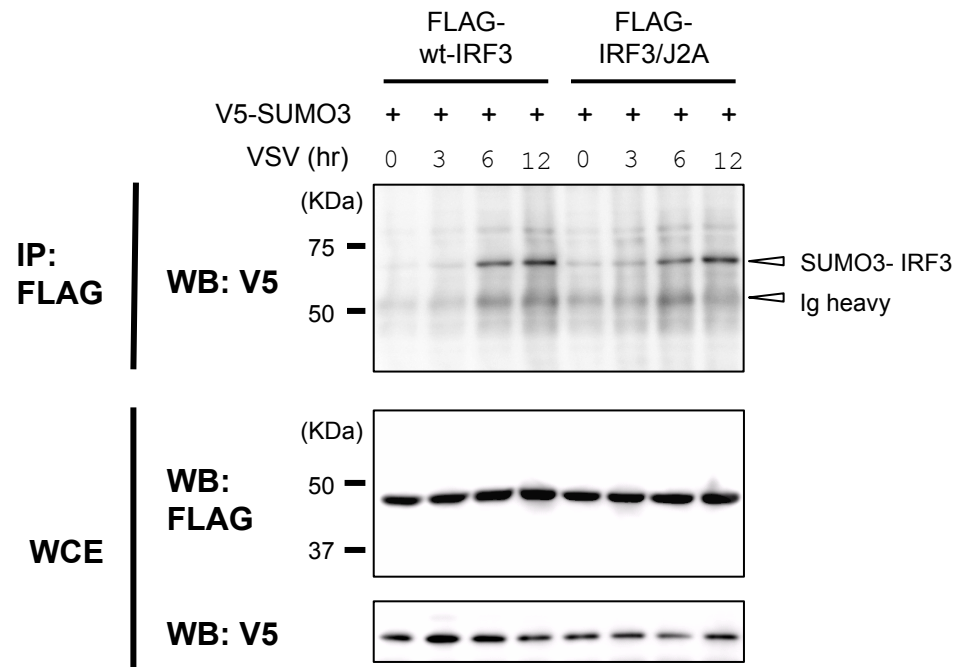



# Supplementary Fig. S4

## A

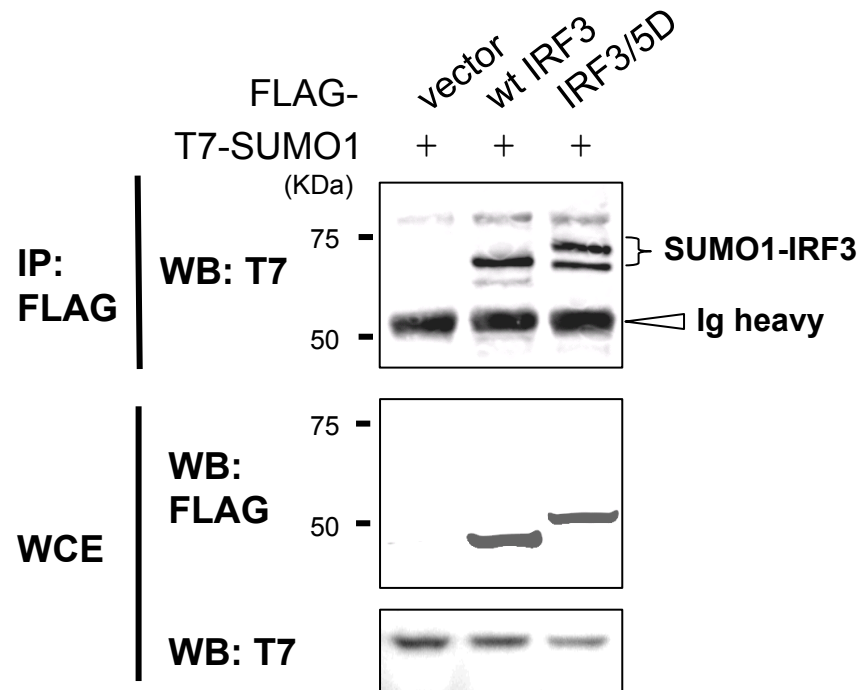

Supplementary Fig. S4

**B**

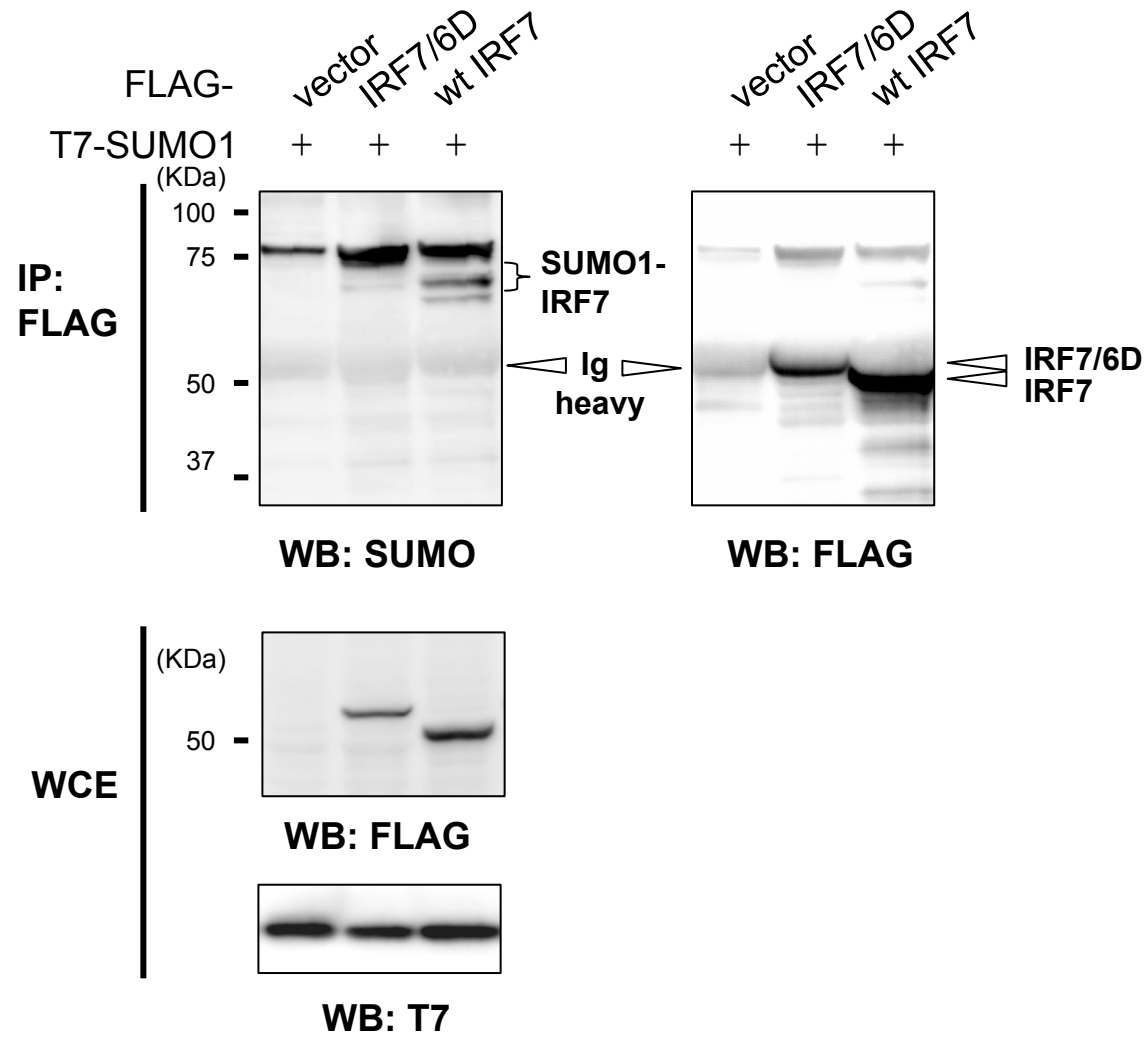

Supplement: M804479200_1.pdf [file M804479200_1.pdf]
